# Supplementary material for: Desistance from crime following substance use treatment: the role of treatment retention, social network and self-control
Source: Springer Nature journal article supplement (doi:10.1186/s12888-021-03518-2), 2021-11-12

**Desistance from crime following substance use treatment: the role of treatment retention, social network and self-control**

Skjærvø, I., Skurtveit, S., Clausen, T. and Bukten, A. (2021)

**Additional file 1**

**Supplementary Table 1** Baseline (T0) characteristics of participants included at follow-up (n=341) compared with participants lost to follow-up (n=207).

|                                                                                         | Included<br>n=341 | Lost to<br>follow-up<br>n=207 | p-value <sup>a</sup>         |
|-----------------------------------------------------------------------------------------|-------------------|-------------------------------|------------------------------|
| <b>Demographics</b>                                                                     |                   |                               |                              |
| Women, n (%)                                                                            | 100 (29)          | 56 (27)                       | p = 0.57                     |
| Age, mean                                                                               | 34.0              | 33.3                          | p = 0.46                     |
| <b>Substance use pattern</b>                                                            |                   |                               |                              |
| <b>Substances/medications among the four most used 6 months before treatment, n (%)</b> |                   |                               |                              |
| Stimulants                                                                              | 229 (67)          | 142 (69)                      | p = 0.73                     |
| Alcohol                                                                                 | 92 (27)           | 61 (29)                       | p = 0.53                     |
| Cannabis                                                                                | 222 (65)          | 148 (71)                      | p = 0.12                     |
| Illicit benzodiazepines                                                                 | 178 (52)          | 106 (51)                      | p = 0.82                     |
| Prescribed benzodiazepines                                                              | 69 (20)           | 42 (20)                       | p = 0.99                     |
| Illicit opiates                                                                         | 170 (50)          | 106 (51)                      | p = 0.76                     |
| Prescribed opiates                                                                      | 74 (22)           | 41 (20)                       | p = 0.60                     |
| <b>Other substance use variables</b>                                                    |                   |                               |                              |
| Number of substances, mean (median)                                                     | 4.3 (4.0)         | 4.6 (4.0)                     | p = 0.34 <sup>b</sup>        |
| Intravenous use 6 months, n (%)                                                         | 219 (64)          | 129 (62)                      | p = 0.65                     |
| Previous treatment (≥ 3 months), n (%)                                                  | 293 (88)          | 176 (86)                      | p = 0.56                     |
| <b>Crime variables</b>                                                                  |                   |                               |                              |
| Any committed crime (yes/no), n (%)                                                     | 217 (64)          | 131 (63)                      | p = 0.93                     |
| Number of criminal acts per month <sup>c</sup> , mean (median)                          | 19.7 (4.0)        | 12.1 (1.7)                    | <b>p = 0.024<sup>b</sup></b> |
| <b>Other variables</b>                                                                  |                   |                               |                              |
| Substance using social network, n (%)                                                   | 180 (53)          | 97 (47)                       | p = 0.18                     |
| Ever served a prison sentence, n (%)                                                    | 206 (60)          | 137 (66)                      | p = 0.18                     |
| Self-control (BSCS) score, mean                                                         | 37.8              | 36.9                          | p = 0.27                     |
| Selected for in-patient treatment, n (%)                                                | 162 (48)          | 103 (50)                      | p = 0.61                     |

Significant p-values in bold. <sup>a</sup> p-values from t-tests and chi-square tests. <sup>b</sup> Equal variances not assumed. <sup>c</sup> Among participants who had committed crime.

**Desistance from crime following substance use treatment: the role of treatment retention, social network and self-control**

Skjærvø, I., Skurtveit, S., Clausen, T. and Bukten, A. (2021)

**Supplementary Figure 1** Types of substances used at baseline (T0) for participants starting OMT and inpatient treatment (n=341).

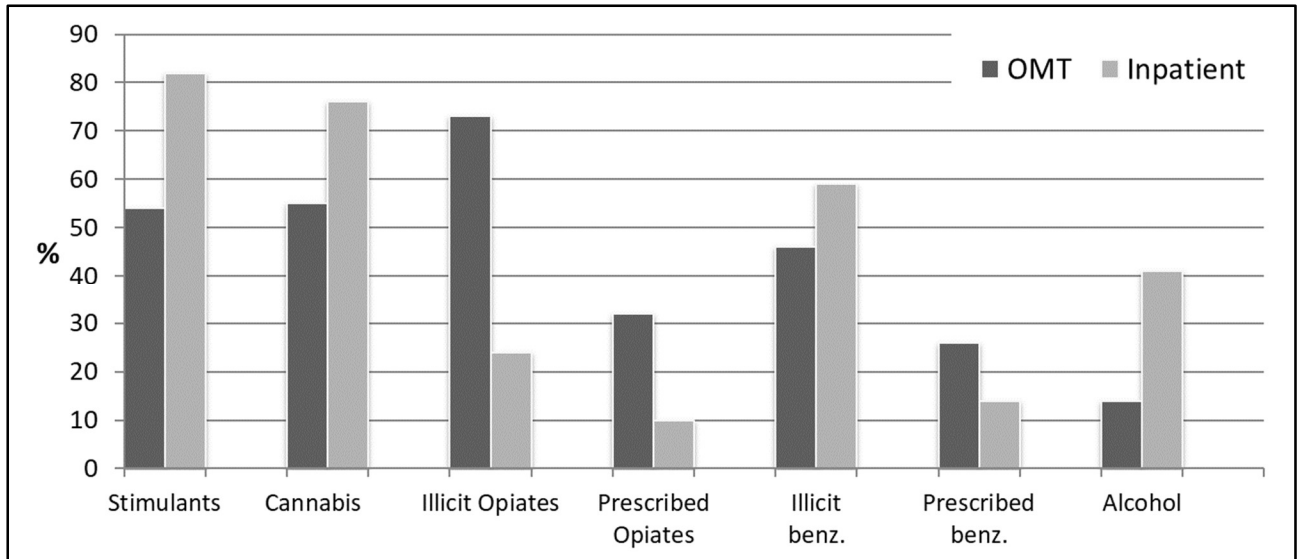

Benz. = Benzodiazepines.

**Supplementary Figure 2.** Percentages of participants (n=341) committing crime (yes/no) in the time-periods before T0 and T1.

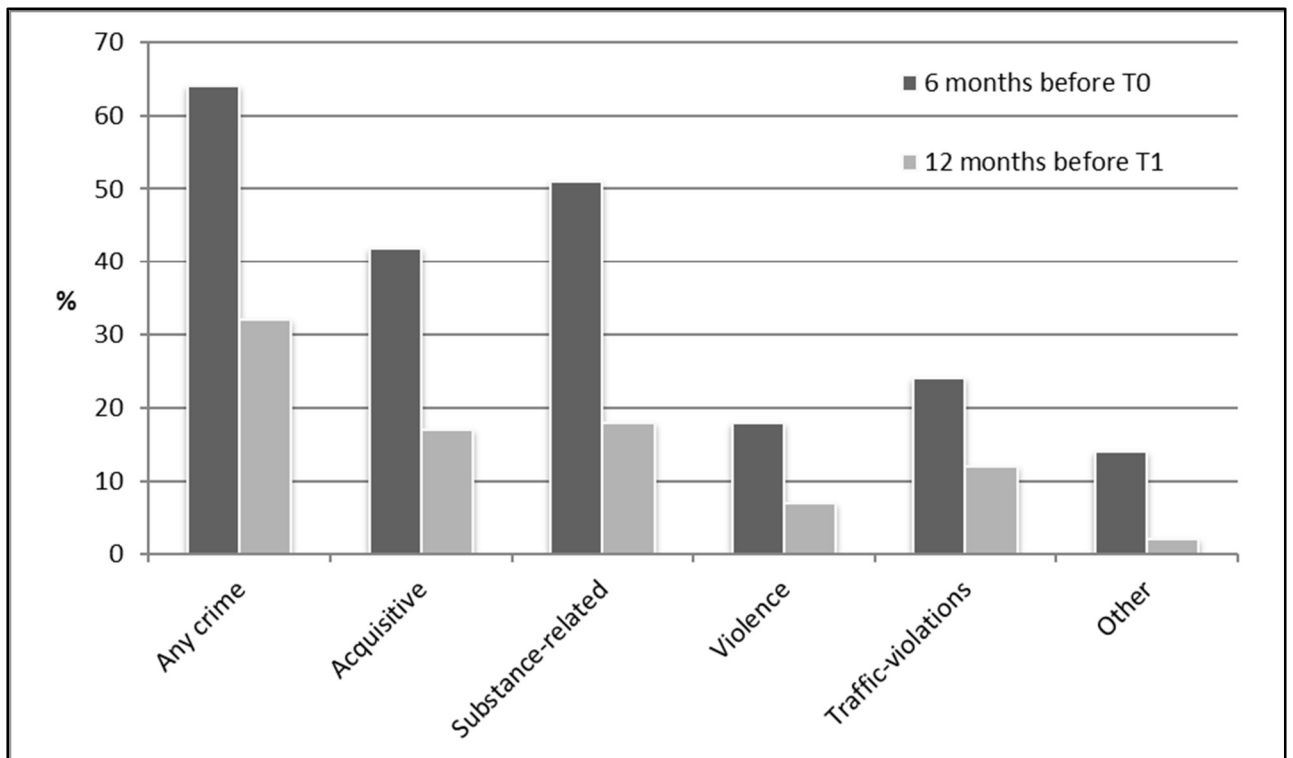

**Desistance from crime following substance use treatment: the role of treatment retention, social network and self-control**

Skjærvø, I., Skurtveit, S., Clausen, T. and Bukten, A. (2021)

**Supplementary Figure 3** Reductions in number of criminal acts from baseline (T0) to follow-up (T1), by treatment type and treatment status (n=63).

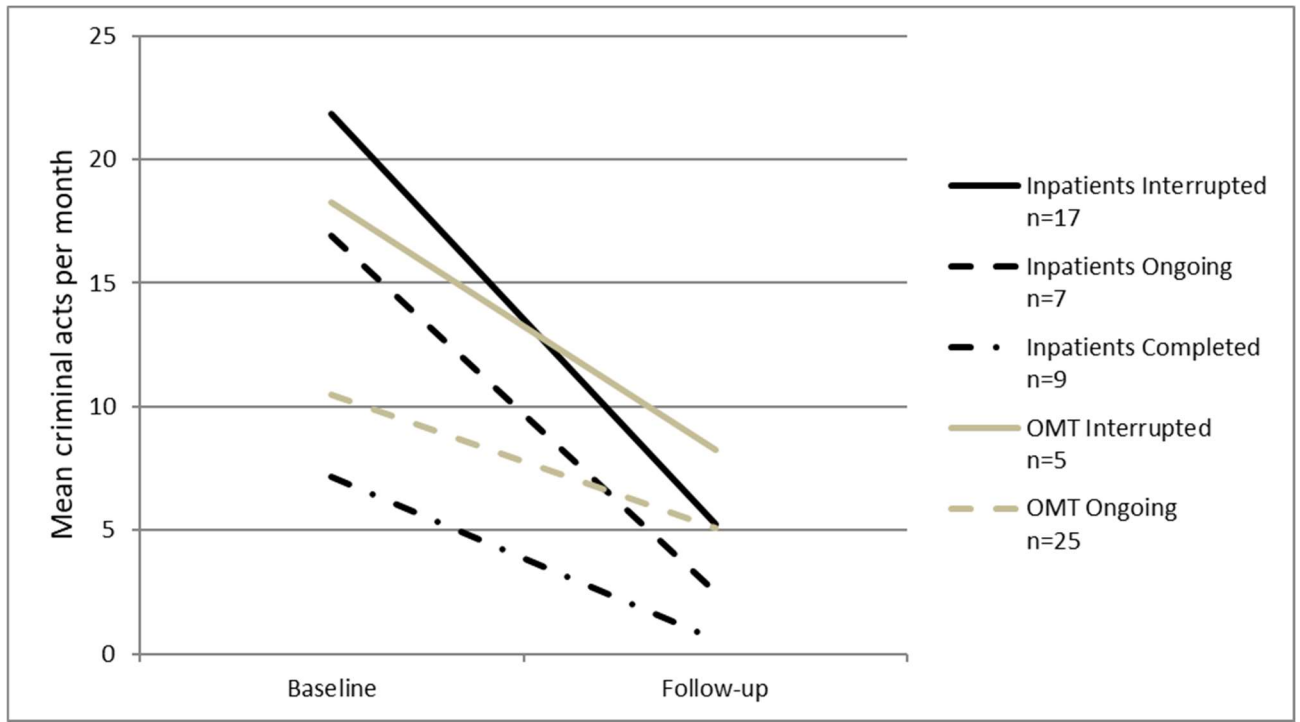

Supplement: MOESM1 [file 19861776]
